# Supplementary material
Source: publisher figshare collection journal article supplement (https://plos.figshare.com/articles/dataset/_/7179200)
Supplement: Supplementary file [file 1]

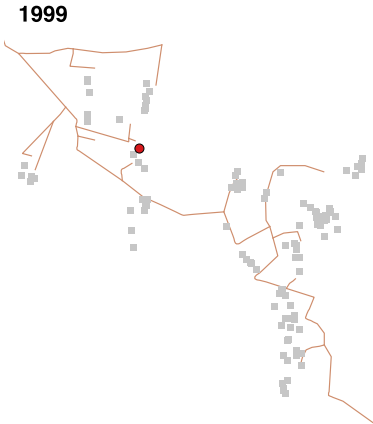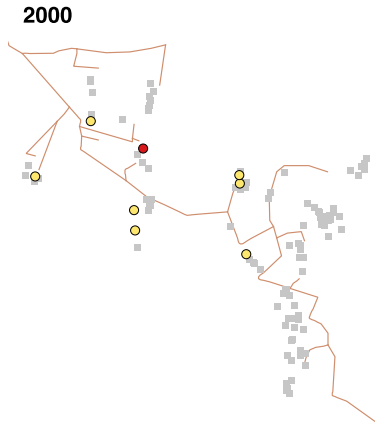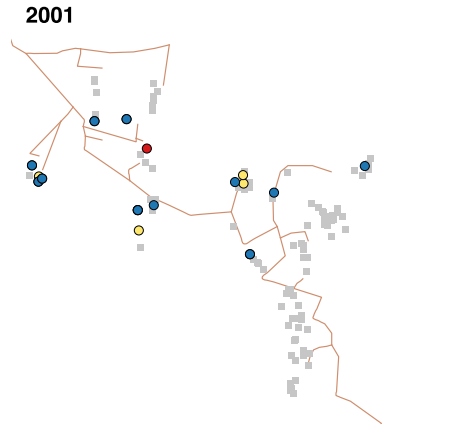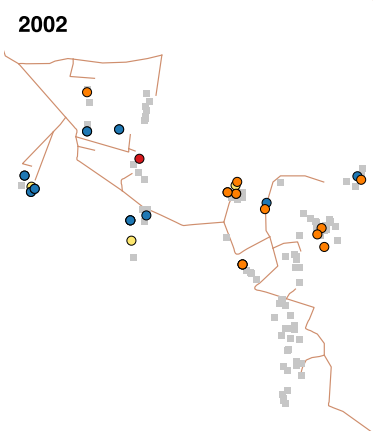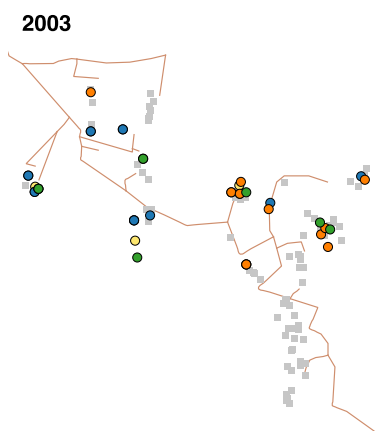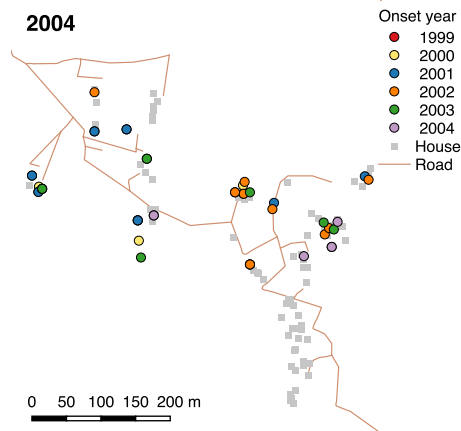

Onset year

- 1999
- 2000
- 2001
- 2002
- 2003
- 2004
- House
- Road

0 50 100 150 200 m

A horizontal scale bar with alternating black and white segments, indicating distances of 0, 50, 100, 150, and 200 meters.
